# Supplementary material for: Bridging the gap in embryogenesis research: North Bornean orangutan-derived blastoids as models for human development
Source: Research Square preprint supplement (doi:10.21203/rs.3.rs-8154543/v1), 2025-12-08
Supplement: Supplementary file 1 [file 4519a39e792f1806b7abea59.docx]

**Supplementary Figure 1: Orangutan iPSCs demonstrated hallmarks of primed pluripotency, maintained a normal karyotype, and were footprint-free. (A)** Primary fibroblasts from a North Bornean orangutan. **(B)** Karyotype of orangutan fibroblasts demonstrating 48 chromosomes, XX. **(C)** Primary orangutan iPSCs derived via episomal electroporation. **(D)** AP staining of orangutan iPSCs derived via Sendai transduction. **(E)** Primary orangutan F+iPSCs derived via episomal electroporation. **(F)** AP staining of orangutan F+iPSCs derived via Sendai viral transduction. **(G)** Karyotype of orangutan F+iPSCs derived via Sendai viral transduction demonstrating 48 chromosomes, XX. **(H)** qRT-PCR analysis for the expression of endogenous pluripotency markers in F+iPSCs derived via Sendai viral transduction, normalized to GAPDH and ACTB, and controlled to source fibroblasts. **(I)** Gel electrophoresis of PCR-amplified products using primers to detect the Sendai viral genome; (+) refers to the positive control in the form of fibroblasts 5 days post-Sendai viral transduction; (-) refers to the negative control in the form of fibroblasts; Passage 18 and 29 refers to F+iPSCs at stated passages. **(J)** Immunostaining confirming positive expression of pluripotency markers in F+iPSCs. **(K)** EB formation from F+iPSCs. **(L)** qRT-PCR analysis for the expression of endogenous pluripotency and germ layer markers in attached EBs formed from F+iPSCs, normalized to GAPDH and controlled to source F+iPSCs. **(M)** Immunostaining confirming positive expression of trilineage differentiation markers in EBs formed from F+iPSCs. Both F+iPSCs and F–iPSCs lines remained stable for over 20 passages, preserving their pluripotent phenotype without signs of genomic instability.
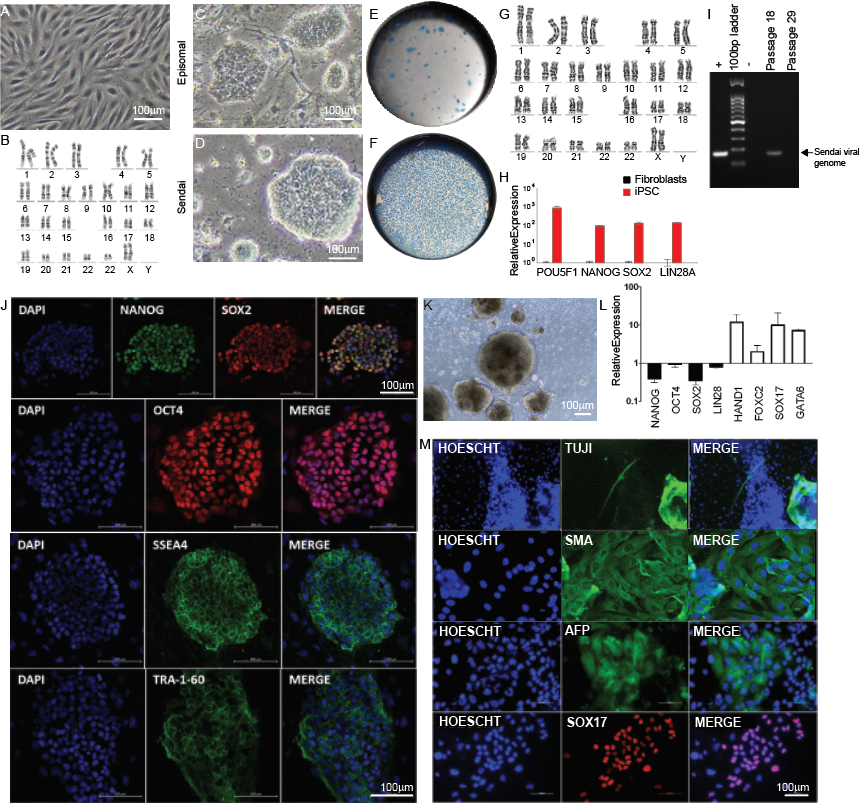


**Supplementary Figure 2:** **Orangutan F+iPSCs, but not F-iPSCs, can form mono-blastoids that encompass the three principal lineages of the preimplantation embryo. (A)** Efficiency of blastoid formation using various numbers of F+iPSCs per microwell. **(B)** Days 0, 1, and 6 of culture of F+iPSCs or F-iPSCs in an AggreWell system to form mono-blastoids. **(C)** Immunostaining confirming localization of SOX2 and OCT4 (EPI-markers) to cells in the ICM-like compartment, CDX2 and GATA2 (TE-markers) to cells in the TE-like compartment, and SOX17 and GATA4 (PE/HYPO-markers) to cells lining the blastocoel-facing EPI-like cells, of orangutan F+blastoids; by contrast, F-blastoids demonstrated poorly defined patterning. **(D)** qRT-PCR analysis for the expression of core pluripotency, naïve pluripotency, TE, and PE/HYPO markers in aggregates harvested from F+blastoid formation, normalized to GAPDH and ACTB, and controlled to source F+iPSCs.


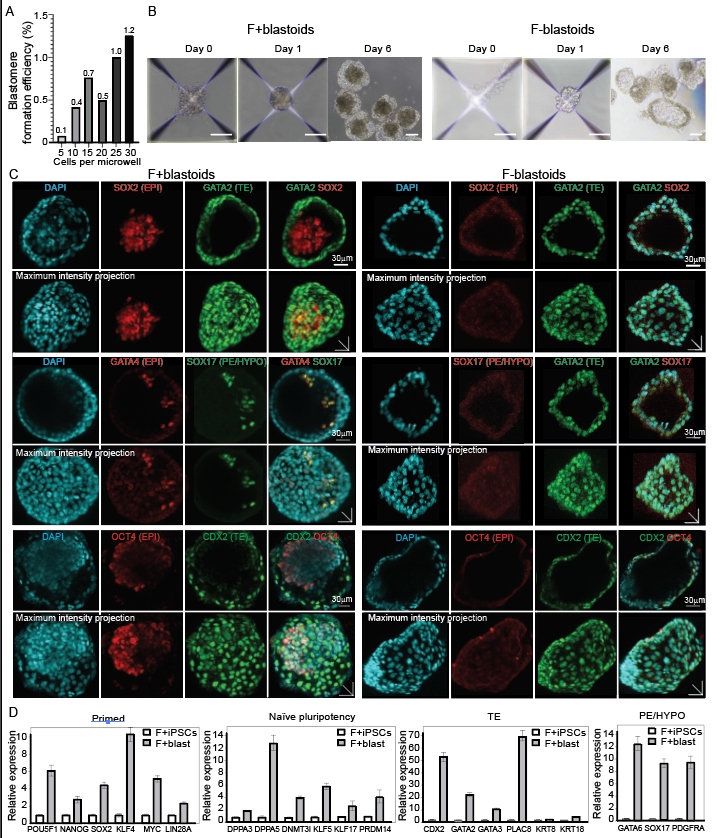


**Supplementary Figure 3: Orangutan F+blastoids exhibited differentially expressed genes representing blastocyst-associated lineages. (A)** Violin plot demonstrating exclusion of cells containing less than 500 genes per cells in scRNA-seq analysis of F+blastoids. **(B)** Top 7 DEGs in each cluster in F+blastoids. **(C)** Expression levels of EPI-associated markers (POU5F1, SOX2, KLF4, DPPA2, DPPA3, DPPA5, DNMT3L, PRDM14, KLF17, FGF4, GDF3), TE-associated markers (CDX2, GATA2, GATA3, PLAC8, KRT7, KRT8, KRT18, KRT19, CD24), and PE/HYPO-associated markers (SOX17, GATA6, GATA4, PDGFRA, COL4A1) in F+blastoids.


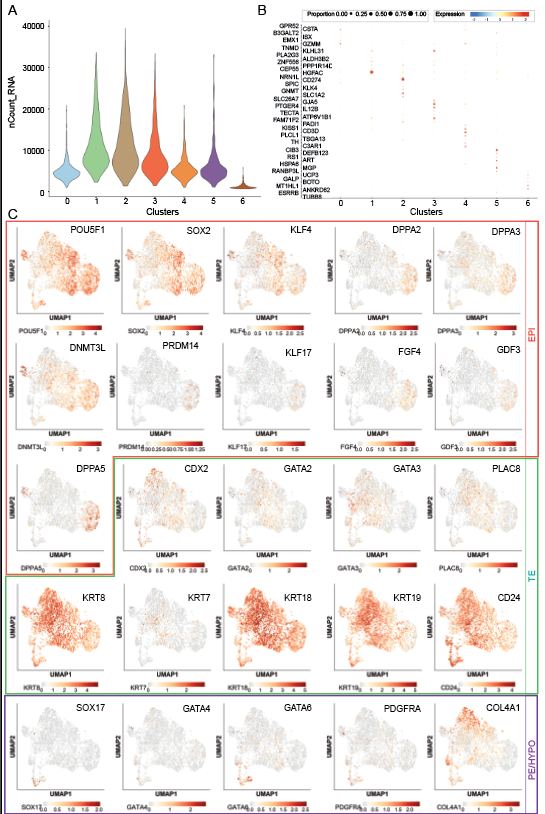


**Supplementary Figure 4: Orangutan bi-blastoids are morphologically and structurally similar to human blastocysts, and encompass the three principal lineages of the preimplantation embryo. (A)** Overall efficiency of blastoid formation using different cell ratios of F+iPSCs and F-iPSCs. **(B)** 240 was the average number of cells per bi-blastoid, which was not significantly different from 394, the average number of cells of F+blastoid. **(C)** Surface areas of orangutan blastoids compared to human blastoids. **(D)** Diameters of orangutan blastoids, where x is measured at the widest point of the blastoid parallel to the blastocoel-facing EPI-like cells, and y is measured at the widest point of blastoid perpendicular to y. **(E)** Immunostaining confirming localization of SOX2 and NANOG (EPI-markers) to GFP- cells in the ICM-like compartment, CDX2 and GATA2 (TE-markers) to GFP+ cells in the TE-like compartment, ZO-1 (TE tight junction molecule) in the intercellular space between TE-like cells, and SOX17 (PE/HYPO-marker) distributed in a salt-and-pepper pattern in the TE-like compartment, of orangutan bi-blastoids.

**
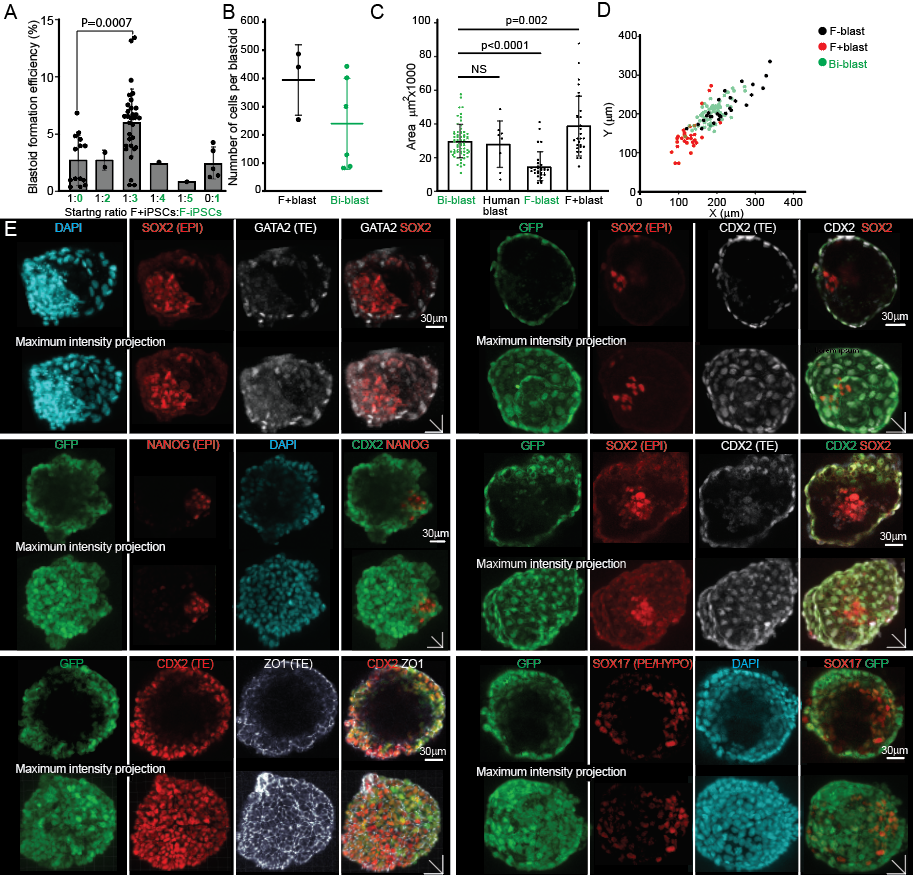
**

**Supplementary Figure 5: Integrated UMAP analysis revealed a transcriptomic overlap between cells of orangutan blastoids, human blastocysts, and human blastoids. (A)** Expression levels of EPI-associated markers (POU5F1, SOX2, KLF4, DPPA2, DPPA3, DPPA5, DNMT3L, PRDM14, KLF17, FGF4, GDF3), TE-associated markers (CDX2, GATA2, GATA3, PLAC8, KRT7, KRT8, KRT18, KRT19, CD24), and PE/HYPO-associated markers (SOX17, GATA6, GATA4, PDGFRA, COL4A1) in bi-blastoids. **(B)** Integrated UMAP analysis of annotated single cells isolated from orangutan blastoids, human blastoids, and human blastocysts; NR = non-reprogrammed. **
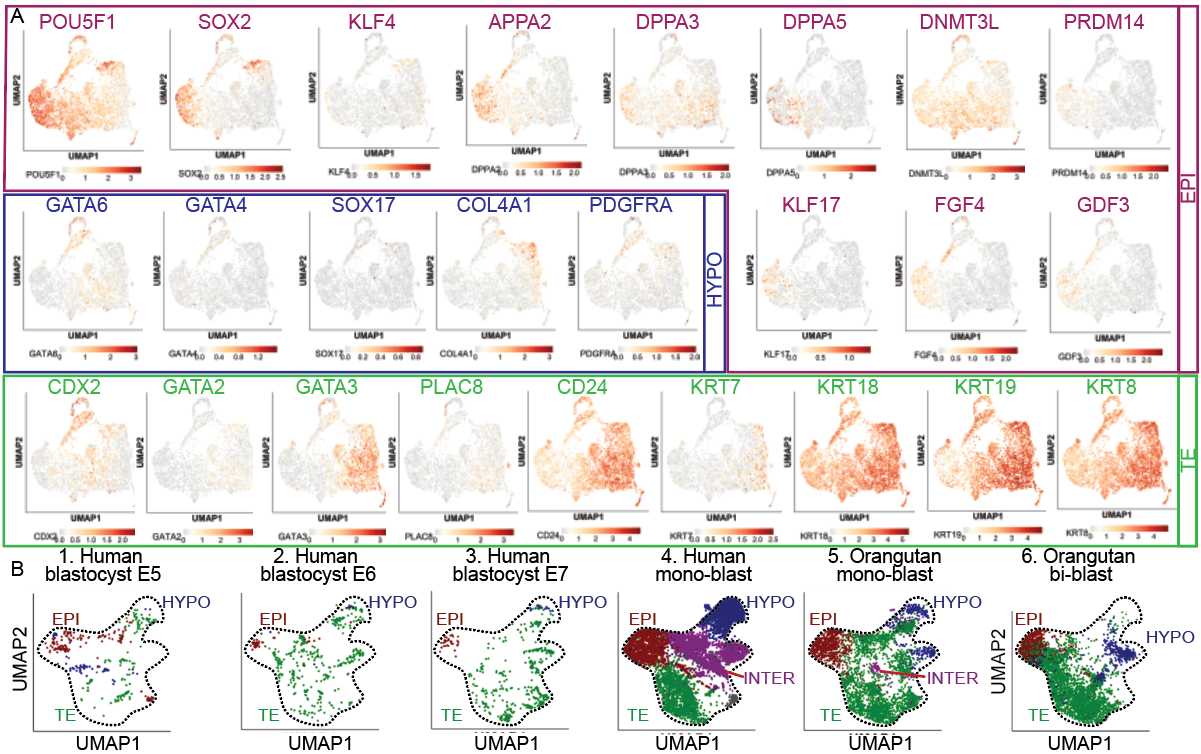
**


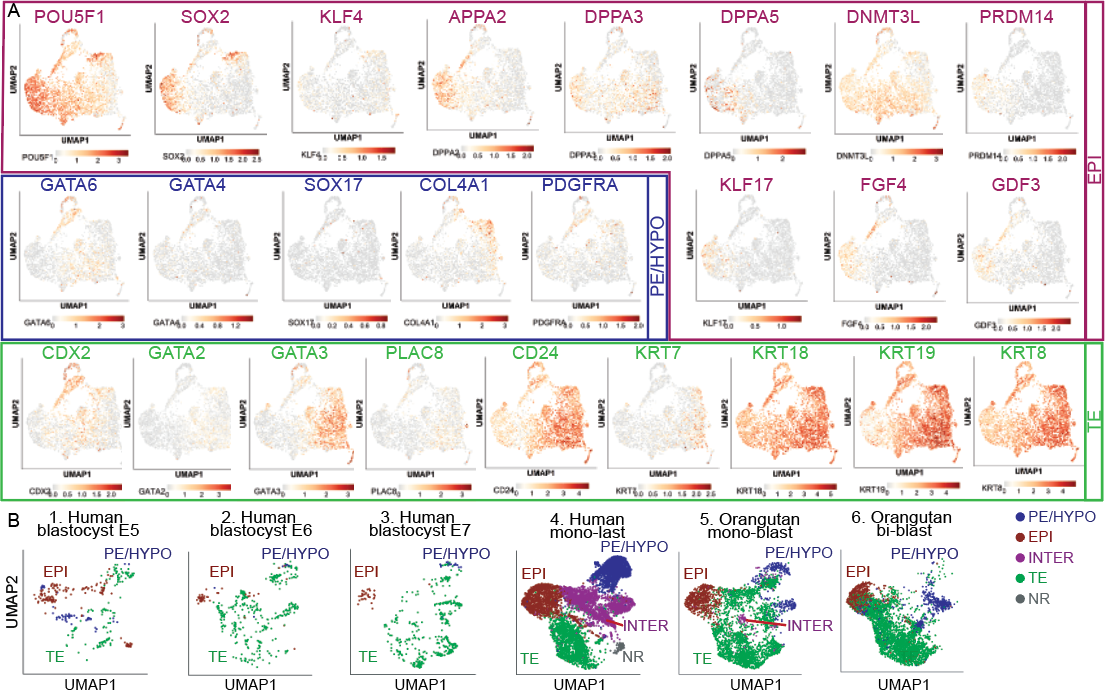


**Supplementary Figure 6: Normalized gene expression of pluripotent stem cell and trophectoderm markers in F+iPSCs and derived ESCLCs and TSCLCs.**


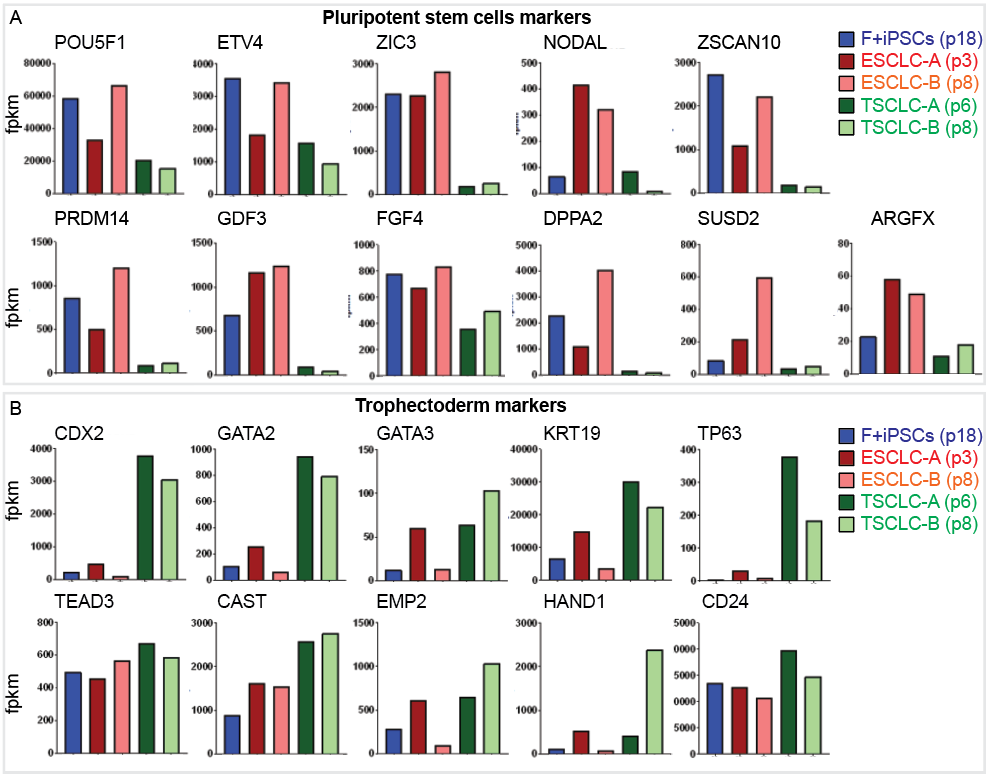


**Supplementary Figure 7: Orangutan blastoids can recapitulate aspects of implantation *in vitro*. (A)** *In vitro* attachment assay of bi-blastoids. **(B)** Immunostaining demonstrating GATA3+ post-implantation trophoblast-like cells and GATA6+ hypoblast-like cells localizing to the periphery of OCT4+ and NANOG+ post-implantation epiblast-like cells, and SOX2+CDX2+ early amnion-like cells, in orangutan blastoids after *in vitro* attachment assay.


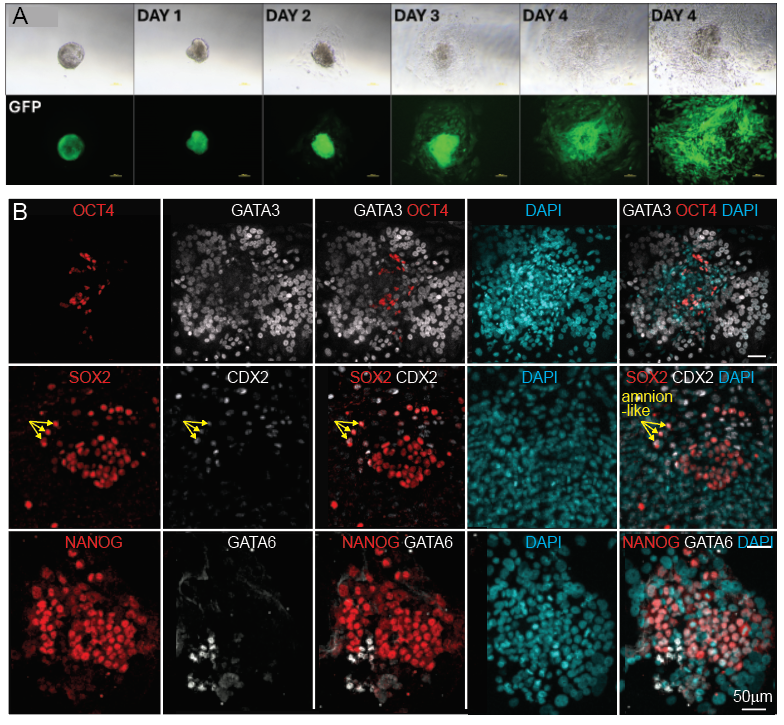


**Supplementary Table 1:** Primers.

| **Gene** | **Forward** | **Reverse** |
| --- | --- | --- |
| *GAPDH* | CTCTCTGCTCCTCCTGTTCG | CCCGATACGACCAAATCCGTT |
| *ACTB* | CGTGAACATCCGCAAAGACC | TGATCTTCATGGTGCTGGGT |
| *NANOG* | GAACTCTCCAACATCCTGAACCTC | AGGTGCTGAGGCTTTCTGAGTC |
| *POU5F1* | GGGAAGGTGTTCAGCCAAACG | TGCACGAGGGTTTCTGCTTTG |
| *SOX2* | TGAACGGCTCGCCAACCTAC | CTGGAGTGGGAGGAAGAGGTAAC |
| *KLF4* | CAAAGAGTTCCCATCTCAAGGC | GTGCCCAGTGTGTTTACGG |
| *MYC* | TTACAACACCCGAGCAAGGA | GCTGGTTTTCCACTACCCGG |
| *LIN28A* | AGCTTCTTCTCCGAACCAC | AGCCACCTGCAAACTGCT |
| *DPPA3* | TTTACAGCGGGAGAGGAGTAAG | GGCCCCTTGTTTGTTGGTATTC |
| *DPPA5* | GTGGGTGAAAGTTCCCGAAGAC | CCTGCTCGATGTAAGGGATTCG |
| *DNMT3L* | GCTCAACAAAGAAGACGAGGAC | TCCACACACGGACAGCATTC |
| *KLF5* | GGAGAAACGACGCATCCACTAC | GAACCTCCAGTCGCAGCCTTC |
| *KLF17* | CCCACCCAGTCTTCATGTACG | GGGCGCTGAGTTCTCGTTATC |
| *PRDM14* | TGTTTCTCTCAGTCTTCCAGCC | TGATGTGTGTGCGGAGTATGC |
| *SUSD2* | CCCCTTCACCATCTCACTGGAC | GTTCACCAACTCGCTCTTCTCC |
| *HAND1* | GAGAGCATTAACAGCGCATTCG | CACGTCCATCAGGTAGGCG |
| *FOXC1* | AGTAGCTGTCAAATGGCCTTC | TGCCTTGATGGGTTCCTTTGG |
| *SOX17* | TGGACCGCACGGAATTTGAAC | GACACCACCGAGGAAATGGC |
| *GATA6* | CTTCCCCCACAACACAACCT | TAGAGCCCATCTTGACCCGA |
| *GATA4* | CCTGTCATCTCACTACGGGCA | GACGCATAGCCTTGTGGGGA |
| *PDGFRA* | GACCCTCCTTTTACCACCTGA | TTGTCTGAGTCCACACGCAT |
| *CDX2* | CTATGCGAGTGGATGCGGAAG | GGATGGTGATGTAGCGACTGTAG |
| *GATA2* | TCAGACGACAACCACCACC | GAAGCACTCCGCCCCTTTCT |
| *GATA3* | GCGGGCTCTACCACAAAATG | ATTGGCGTTCCTCCTCCAGA |
| *KRT8* | AGTACCAGGAGCTGATGAACGTC | TCATGTTCTGCATCCCAGACTC |
| *KRT18* | GATGCCCCCAAATCTCAGGA | ACTGTGGTGCTCTCCTCAATC |
| *PLAC8* | GCTCCCCAGAACTCCAACTG | ACGCTTGTTCCACACAGACA |
| *TF63* | AGAAACGAAGATCCCCAGATGA | CTGTTGCTGTTGCCTGTACGTT |
| *HAVCR1* | AAACCCACCCTACGATACTGC | TATGTGCTGGGGACAGTTGAG |
| *TFAP2C* | ACCGTGACCCCGATTTTGGA | ATTCCCATTGCTGCTCCCGT |
| *ITGB6* | ATCGGTCTGCACAGCAAGAACT | AAGCAGGCAGTCTTCACAGGT |
| *GABRP* | TGGTGGTGTTGTCCTGGGTT | GTTGGTGTTGGGAAGGGAAGC |
| *BMP4* | GCTGTAGGAGCCATTCCGT | TTCTTCCCCGTCTCAGGTATCA |
| *PRDM1* | ACCTGGCTGCGTGTCAGAAC | GTGCTCGGTTGCTTTAGATTGCTC |

**Supplementary Table 2:** Antibodies.

| **Antibodies** | **Source / Cat. No.** | **Dilution** |
| --- | --- | --- |
| NANOG | PeptroTech / 500-p236 | 1/100-200 |
| SOX2 | R&D Systems / af2018 | 1/25-50 |
| OCT4 | Abcam / ab19857 | 1/250-500 |
| SSEA4 | Abcam / ab16287 | 1/500 |
| TRA-1-60 | Abcam / ab16288 | 1/500 |
| TUJ-1 | R&D Systems / mab1195 | 1/100 |
| SMA | R&D Systems / mab1420 | 1/50 |
| AFP | R&D Systems / mab1368 | 1/20 |
| SOX17 | Abcam / ab224637 | 1/250 |
| GATA6 | R&D Systems / af1700 | 1/10 |
| GATA4 | eBioscience / 14998082 | 1/200 |
| CDX2 | Abcam / ab76541 | 1/250-500 |
| GATA2 | Abcam / ab109241 | 1/200 |
| NR2F2 | Abcam / ab211776 | 1/25-50 |
| ZO-1 | Invitrogen / 339100 | 1/50 |
| CK7 | Abcam / ab181598 | 1/300 |
| HLA-G | Santa Cruz Biotechnology / sc21799 | 1/50 |
| hCG-β | Abcam / ab9582 | 1/100 |
